# Supplementary material
Source: ML conference proceedings conference paper supplement (https://proceedings.mlr.press/v48/shaham16.html)
Supplement: Supplementary file [file shaham16-supp.pdf]

## A. Proof of Lemma 4.1

*Proof.* We will define  $\theta$  so that for every  $x, y$ ,  $p_\theta(X_i = x_i | Y = y) = p_\lambda(X_i = x_i | H = y)$  and  $p_\theta(Y = y) = p_\lambda(H = y)$ .

Since the weight matrix  $W$  has dimension  $d \times 1$  in this case, it is a vector, which we will denote as  $w$ . Recall that

$$p_\lambda(X_i = 1 | H = y) = \sigma(a_i + w_i y),$$

hence we define

$$\psi_i \equiv \sigma(a_i + w_i)$$

and

$$\eta_i \equiv 1 - \sigma(a_i).$$

Finally, recall that

$$\begin{aligned} p_\lambda(H = 1) &= \frac{\sum_{x \in \{0,1\}^d} e^{-E_\lambda(x,1)}}{\sum_{x \in \{0,1\}^d, h \in \{0,1\}} e^{-E_\lambda(x,h)}} \\ &= \frac{\sum_{x \in \{0,1\}^d} e^{a^T x + b + x^T w}}{\sum_{x \in \{0,1\}^d} e^{a^T x} + e^{a^T x + b + x^T w}}, \end{aligned}$$

where  $E_\lambda$  is the energy function given in equation (2), hence we set

$$\pi \equiv \frac{\sum_{x \in \{0,1\}^d} e^{a^T x + b + x^T w}}{\sum_{x \in \{0,1\}^d} (e^{a^T x} + e^{a^T x + b + x^T w})}. \quad (3)$$

To see that the map  $\lambda \mapsto \theta$  is 1:1, note that  $a_i$  uniquely determines  $\eta_i$ , hence  $(a_i, w_i)$  uniquely determine  $(\psi_i, \eta_i)$ . Lastly, rearranging equation (3) we get

$$\begin{aligned} \pi \sum_{x \in \{0,1\}^d} (e^{a^T x} + e^{a^T x + b + w^T x}) &= \sum_{x \in \{0,1\}^d} e^{a^T x + b + w^T x} \\ \Rightarrow \pi \sum_{x \in \{0,1\}^d} e^{a^T x} &= (1 - \pi) e^b \sum_{x \in \{0,1\}^d} e^{a^T x + w^T x} \\ \Rightarrow e^b &= \frac{\pi}{1 - \pi} \frac{\sum_{x \in \{0,1\}^d} e^{a^T x}}{\sum_{x \in \{0,1\}^d} e^{a^T x + w^T x}}, \end{aligned}$$

so that given  $(a, W)$ ,  $\pi$  is uniquely determined by  $b$ . Showing that the map  $\lambda \mapsto \theta$  is also subjective is straightforward. Hence it is a bijection.  $\square$

## B. Proof of Lemma 4.2

*Proof.* Since  $d \geq 3$  and for each  $i$ ,  $X_i$  is not independent of  $Y$ , by Chang (1996), the parameter  $\theta$  of the conditional independence model is identifiable. Since the map  $\lambda \mapsto \theta$  in Lemma 4.1 is a bijection, there exists  $\lambda$  corresponding to  $\theta$ , which is therefore identifiable as well. By the consistency property of the MLE (see, for example, (Casella & Berger, 2002)),

$$\lim_{n \rightarrow \infty} \hat{\lambda}_{\text{MLE}} = \lambda.$$

Since  $p_\lambda(H = 1 | X)$  is continuous in  $\theta$ , one obtains

$$p_{\hat{\lambda}_{\text{MLE}}}(H = 1 | X) \rightarrow p_\lambda(H = 1 | X).$$

Finally, note that Lemma 4.1 implies, in particular, that under the map  $\lambda \mapsto \theta$

$$p_\lambda(H = 1 | X) = p_\theta(Y = 1 | X),$$

which completes the proof.  $\square$

## C. Stacking RBMs as a Variational Inference Procedure

Variational inference is a common approach to tackle complicated probability estimation problems (see, for example, (Bishop, 2006; Fox & Roberts, 2012), and a recent review (Blei et al., 2016)). Specifically, let  $p$  be a target probability distribution that we want to approximate. In variational inference we define a family of approximate distributions  $\mathcal{D} = \{q_\alpha : \alpha \in \mathcal{A}\}$ , and then perform optimization to find the member of  $\mathcal{D}$  that is closest to  $p$  in Kullback-Leibler distance. A key idea is that the family  $\mathcal{D}$  is flexible enough to contain a distribution close to  $p$ , yet simple enough to perform optimization over. For example, a popular choice is to take  $\mathcal{D}$  as the collection of factorized distributions, i.e., of the form  $q_\alpha(X) = \prod_i q_\alpha(X_i)$ . In this section, we motivate the use of RBM-based DNN by considering a specific data generation model, and showing that training a stack of RBMs on data generated by this model is in fact a variational inference procedure.

The generative model we consider is a two layer Deep Belief Network (DBN), which played an important role in the emergence of deep learning in 2006 (Hinton et al., 2006). The DBN we consider generates data  $Y \in \{0, 1\}$ ,  $H \in \{0, 1\}^m$ ,  $X \in \{0, 1\}^d$  via the probability distribution

$$p_\theta(X, H, Y) \equiv p_{\theta_1}(X, H) p_{\theta_2}(Y | H)$$

where  $X, H$  form a RBM (parametrized by  $\theta_1$ ).

We observe data  $x^{(1)} \dots x^{(n)}$  from  $p_\theta(X)$  and our goal is to estimate the posterior  $p_\theta(y^{(i)} | x^{(i)})$  for  $i = 1, \dots, n$ . The posterior can be written as

$$p_\theta(Y | X) = \mathbb{E}_{h \sim p_{\theta_1}(H | X)} P_{\theta_2}(Y | H = h).$$

Cueto et al. (2010) showed that as long as  $m$  is not too large comparing to  $d$ , RBMs are locally identifiable, i.e., identifiable up to order and flips of hidden units (Jason Morton, personal communication). Therefore, when training a RBM with  $m$  hidden units on  $x^{(1)} \dots x^{(n)}$ , by the consistency property of the MLE (Casella & Berger, 2002) the MLE  $\hat{\theta}_{1\text{MLE}}$  will converge to the true parameter  $\theta_1$  as  $n \rightarrow \infty$ . Hence, when  $n$  is large enough, the vectors  $h^{(i)}$

obtained from the (trained) RBM are in fact samples from  $p_{\theta_1}(H|X = x^{(i)})$ .

At the next step, the vectors  $h^{(1)} \dots h^{(n)}$  are used to train a second RBM, with a single hidden node. Observe that in the data generation model considered in this section,  $p_{\theta}(H|Y)$  does not factorize. The factorized distribution  $p_{\lambda}(H|Y)$  that minimizes  $\text{KL}(p_{\theta_2}(H|Y) \| p_{\lambda}(H|Y))$  is given by

$$p_{\lambda}(H_i|Y) = p_{\theta_2}(H_i|Y)$$

Bishop (2006) (Chapter 10). By Lemma 4.1, we know that the distribution

$$p_{\lambda}(H, Y) = p_{\theta}(Y) \prod_i p_{\theta_2}(H_i|Y) \quad (4)$$

is equivalent to a RBM. Finally, by Lemma 4.2, the distribution (4) is consistently estimated by a RBM trained on vectors  $h^{(1)} \dots h^{(n)}$ , and is thus a variational inference procedure.

#### D. Stacking RBMs as an Approximation for a Directed Top-Down Model

Assume that the data is generated by a Markov chain  $Y \rightarrow H \rightarrow X$ , where  $Y \in \{0, 1\}$ ,  $H \in \{0, 1\}^m$ ,  $X \in \{0, 1\}^d$ . We further assume that the distributions  $p_{\theta}(X|H)$ ,  $p_{\theta}(H|Y)$  factorize, i.e.,

$$p_{\theta}(X|H) = \prod_{i=1}^d \text{Pr}(X_i|H) \quad (5)$$

and

$$p_{\theta}(H|Y) = \prod_{i=1}^m \text{Pr}(H_i|Y), \quad (6)$$

and are given by RBM-like conditional distributions, i.e.,

$$p_{\theta}(X_i = 1|H) = \sigma(a_i + W_{i,\cdot}H) \quad (7)$$

and

$$p_{\theta}(H_i = 1|Y) = \sigma(b_i + U_{i,\cdot}Y). \quad (8)$$

Hence the corresponding data generation probability is parametrized by  $\theta = (\pi, a, b, W, U)$ , where  $\pi = \text{Pr}(Y = 1)$ .

This data generation process is depicted in Figure 10.

The posterior probabilities  $p_{\theta}(Y|X)$  are given by

$$\begin{aligned} p_{\theta}(Y|X) &= \sum_{H \in \{0,1\}^m} p_{\theta}(Y|H) p_{\theta}(H|X) \\ &= \mathbb{E}_{h \sim p_{\theta}(H|X)} p_{\theta}(Y|H = h). \end{aligned}$$

By Section 4, we know that  $p_{\theta}(H, Y)$  is equivalent to a RBM. Therefore, to accurately estimate the posterior, it suffices to approximate  $p_{\theta}(H|X)$ .

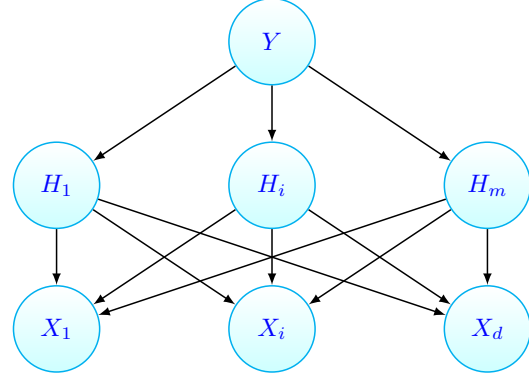

Figure 10. Data generated by a Markov Chain  $Y \rightarrow H \rightarrow X$  with RBM-like conditional probabilities.

Under the data generation model described in Figure 10 and equations (5)-(8), it is evident that the joint distribution  $p_{\theta}(X, H)$  cannot be parametrized as a RBM; indeed,  $p_{\theta}(H|X)$  does not factorize. Hence, training a RBM on samples from  $p_{\theta}(X)$ , is a mean field approximation of  $p_{\theta}(H|X)$ . The form of  $p_{\theta}(X, H)$  is shown in the following lemma.

**Lemma D.1.** *Under the data generation model described in Figure 10 and equations (5)-(8), the joint distribution  $p_{\theta}(X, H)$  is given by*

$$p_{\theta}(X, H) = \exp(a^T X + X^T W H + b^T H) Z(H)$$

where

$$\begin{aligned} Z(H) &= \frac{1}{\sum_{X \in \{0,1\}^d} \exp(a^T X + X^T W H)} \\ &\times \sum_{Y \in \{0,1\}} \frac{p_{\theta}(Y) \exp(H^T U Y)}{\sum_{H'} \exp(b^T H' + H'^T U Y)} \end{aligned}$$

*Proof.* By definition,

$$\begin{aligned} p_{\theta}(X, H) &= \sum_{Y \in \{0,1\}} p_{\theta}(X, H, Y) \\ &= \sum_{Y \in \{0,1\}} p(Y) p_{\theta}(H|Y) p(X|H) \quad (9) \end{aligned}$$

Writing

$$p_{\theta}(X|H) = \frac{\exp(a^T X + X^T W H)}{\sum_{X' \in \{0,1\}^d} \exp(a^T X' + X'^T W H)}$$

and similarly

$$p_{\theta}(H|Y) = \frac{\exp(b^T H + H^T U Y)}{\sum_{H' \in \{0,1\}^m} \exp(b^T H' + H'^T U Y)},$$

we obtain

$$p_\theta(X|H)p_\theta(H|Y) = \frac{\exp(a^T X + X^T W H + b^T H + H^T U Y)}{(\sum_{X'} \exp(a^T X' + X'^T W H)) (\sum_{H'} \exp(b^T H' + H'^T U Y))}. \quad (10)$$

Plugging equation (10) in equation (9) we get

$$p_\theta(X, H) = \exp(a^T X + X^T W H + b^T H) \times \frac{1}{\sum_{X'} \exp(a^T X' + X'^T W H)} \times \sum_{Y \in \{0,1\}} \frac{p_\theta(Y) \exp(H^T U Y)}{\sum_{H'} \exp(b^T H' + H'^T U Y)}$$

□

From lemma D.1 we see that  $p_\theta(H|X)$  is close to be factorizable if  $Z(H)$  is a approximately a log-linear function of  $H$  and  $p_\theta(X)$  is approximately a log-linear function of  $X$ .

## E. Datasets and Experimental Details

### E.1. Simulated Dataset Generation Details

- **CondInd**: the label  $Y$  was sampled from a Bernoulli(0.5) distribution; The specificity  $\eta_i$  and sensitivity  $\psi_i$  of the variables  $X_i$ ,  $i = 1 \dots 5$  were sampled uniformly from  $[0.5, 1]$ . The other ten  $X_i$ 's were random guesses, i.e., had specificity = sensitivity = 0.5.
- **Tree15-3-1**: the label  $Y$  was sampled from a Bernoulli(0.5) distribution; each node in the intermediate and layer was generated from his parent with specificity and sensitivity sampled uniformly from  $[0.8, 1]$ , and in the bottom layer with specificity and sensitivity sampled uniformly from  $[0.6, 1]$ .
- **LayeredGraph15-5-5-1**: Data is generated from a Layered Graph with four layers of dimensions 1,5,5,15, starting at the true label  $Y$ . Each layer in the graph is generated from the above layer, and the graph has sparse connectivity (about 30% of the edges exist). For every node  $i$  and parent  $j$  we sample specificity  $\psi_{ij}$  and sensitivity  $\eta_{ij}$  uniformly. Finally, the value at each node was calculated as the weighted sum of the probabilities of the node being 1 given the values of the nodes in the preceding layer, normalized by the sum over the edges. The label  $Y$  was sampled from a Bernoulli(0.5) distribution.
- **TruncatedGaussian**: the label  $Y$  was sampled from a Bernoulli(0.5) distribution. One Gaussian had mean

vector  $\mu_1$  were each of the 15 coordinates was sampled uniformly. The other Gaussian had mean vector  $\mu_2 = -\mu_1$ . Both Gaussians had identical covariance matrix, with off diagonal entries of 0.5 and diagonal entries of 1.

### E.2. The Magic Datasets

An example for the correlation matrix of the 16 classifiers given the 0 class can be seen in Figure 12.

### E.3. Hyper Parameters

In all experiments, we used stochastic gradient descent with minibatch size of 100. The hyper parameters we found important to tune were learning rate and the  $\ell_2$  penalty. In all our experiments we found that for both parameters, a value between 0.01-0.1 is satisfactory. The hyper parameters were tunes based on examination of the reconstruction error and free energies on a validation set.

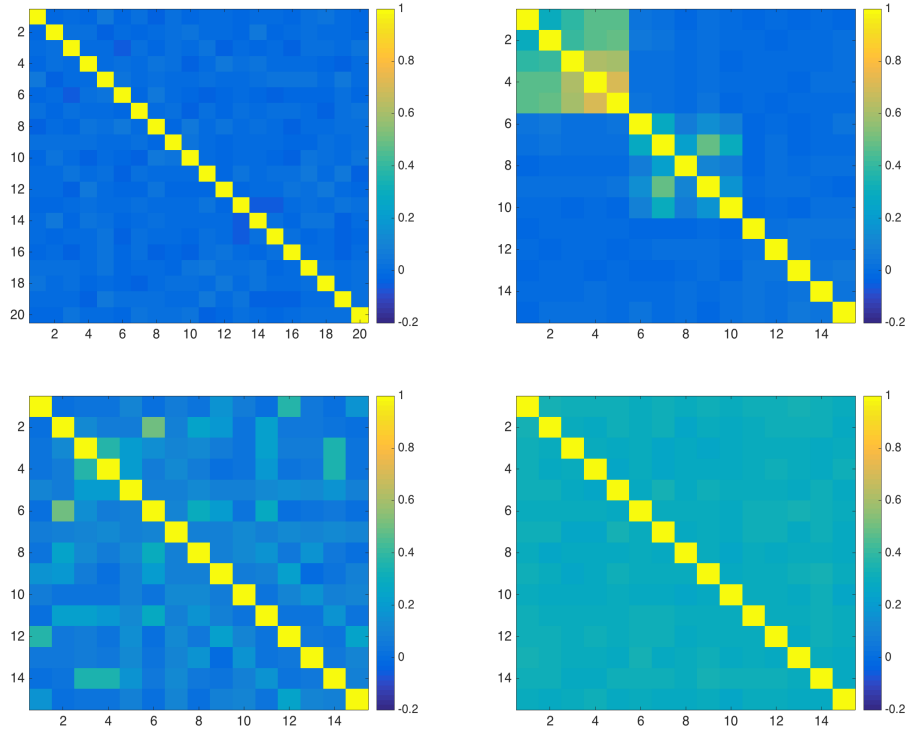

Figure 11. correlation matrices of the input data, for the  $y = 0$  class in all four simulated datasets: condInd (top left), tree15-3-1 (top right), LayeredGraph (bottom left), TruncatedGaussian (bottom right).

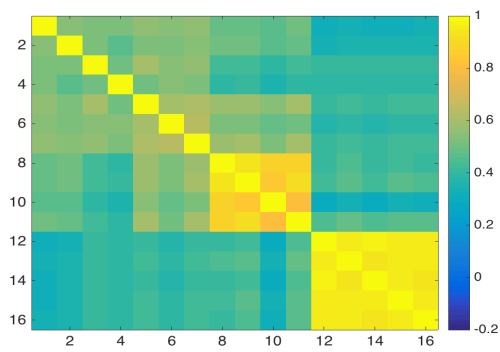

Figure 12. correlation matrix of the 16 classifiers in the Magic1 dataset, for the  $y = 0$  class.
